# Supplementary material
Source: PubMed Central journal article supplement (PMC6909930)
Supplement: NIHMS1543838-supplement-1.pdf [file NIHMS1543838-supplement-1.pdf]

## **Supplementary Information**

### Table of Contents:

SI Fig. 1 – Loss of activity in P24A SUMO-PglC.

SI Fig. 2 – Comparison of wild-type and P24A PglC-His<sub>6</sub> SMALP purification.

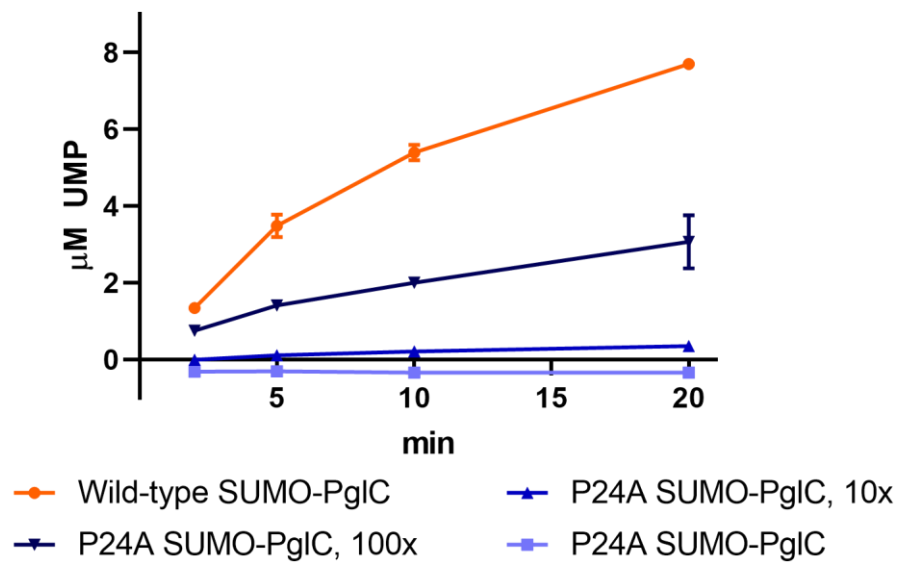

**SI Fig. 1 – Loss of activity in P24A SUMO-PglC.**

Activity assays of wild-type and P24A SUMO-PglC variants using UMP-Glo to monitor UMP release. P24A SUMO-PglC does not achieve native levels of activity even when assayed at 100x concentration relative to wild-type SUMO-PglC. Error bars are given for mean  $\pm$  SD, n = 2.

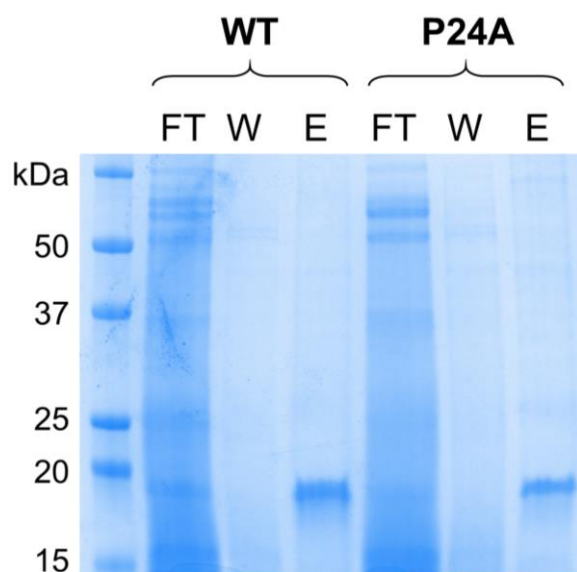

**SI Fig. 2 – Comparison of wild-type and P24A PglC-His<sub>6</sub> SMALP purification.**

Coomassie-stained SDS-PAGE gel showing purification of SMA-lipoparticles with wild-type (WT) and P24A PglC-His<sub>6</sub> variants, purified by Ni-NTA affinity chromatography. FT = flow-through; W = wash; E = elution.
